# Supplementary material
Source: Springer Nature journal article supplement (https://www.springermedizin.de/resource/supplementary/12887_2006_157_MOESM1_ESM.pdf/9477388)

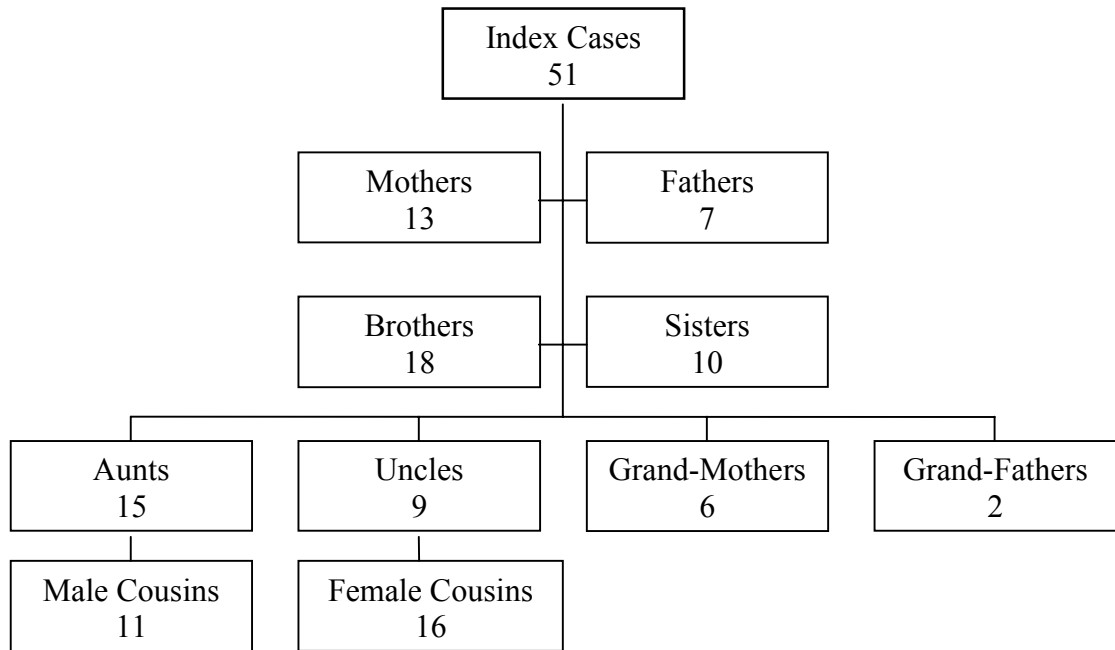

Supplement: MOESM1 [file 9477388]
